# Supplementary material for: Destabilization of the replication fork protection complex disrupts meiotic chromosome segregation
Source: PubMed Central journal article supplement — Mol Biol Cell. 2017 Nov 1;28(22):2978–97. doi: 10.1091/mbc.E17-02-0101 (PMC5662257; doi:10.1091/mbc.e17-02-0101), 2017-11-01

# Supplemental Materials

*Molecular Biology of the Cell*

Escorcía and Forsburg

| Recombination dynamics and relative spore viability of <i>dmc1Δ</i> cells |     |                               |                         |                |                      |
|---------------------------------------------------------------------------|-----|-------------------------------|-------------------------|----------------|----------------------|
| Intergenic interval                                                       | Chr | Genetic Distance cM           |                         | Fold Reduction | p-value <sup>b</sup> |
|                                                                           |     | WT                            | <i>dmc1Δ</i>            | <i>dmc1Δ</i>   | <i>dmc1Δ</i>         |
| his4-lys4 <sup>a</sup>                                                    | 2   | 6.81 ± 0.92                   | 4.70 ± 0.82             | 1.45           | p<0.01               |
| Intragenic interval <sup>d</sup>                                          | Chr | Frequency (x10 <sup>3</sup> ) |                         | Fold Reduction | p-value <sup>c</sup> |
| ade6-M26-52                                                               | 3   | 3.34 ± 0.08<br>(60/17987)     | 1.90 ± 1.20<br>(9/4696) | 1.76           | 0.2184               |
|                                                                           |     | % relative viability          |                         | % Reduction    | p-value <sup>c</sup> |
|                                                                           |     | 100.00 ± 0.47                 | 85.87 ± 1.57            | 14.13          | p<0.05               |

<sup>a</sup>Markers in this interval were scored in repulsion (+/-+).

<sup>b</sup>Significance calculated by 2-tail student *t*-test.

<sup>c</sup>Significance calculated by chi-squared analysis.

<sup>d</sup>Frequency values were calculated by dividing number of ade+ by total number of colonies screened (shown in parenthesis).

## List of strains used in this work

| FY number | Genotype                                                        | Figure or Table | Source     |
|-----------|-----------------------------------------------------------------|-----------------|------------|
| 7         | h-                                                              | 1A; S1A         | lab stock  |
| 8         | h+                                                              | 1A; S1A         | lab stock  |
| 9         | h- leu1-32                                                      | Table 1         | lab stock  |
| 527       | h- his3-D1 ade6-M216 ura4-D18 leu1-32                           | 1A; S1A         | lab stock  |
| 528       | h+ his3-D1 ade6-M210 ura4-D18 leu1-32                           | 1A; S1A         | lab stock  |
| 1251      | h+ ade6-M26 his4-239                                            | Table 1         | lab stock  |
| 1668      | h- dmc1Δ::ura4+ ade6-52 lys4-95 ura4-D18                        | S1A             | lab stock  |
| 1669      | h+ dmc1Δ::ura4+ ade6-M26 his4-239 ura4-D18                      | S1A             | lab stock  |
| 2057      | h- pat1-114 ade6-M216 can1-1                                    | 1B-D; S2A       | lab stock  |
| 3226      | h- Δswi1::kanmx ura4-D18 leu1-32 ade6-M210 his3-D1              | 1A; S1A         | lab stock  |
| 3227      | h+ Δswi1::KanMX ura4-D18 leu1-32 ade6-M210 his3-D1              | 1A; S1A         | lab stock  |
| 3228      | h+ Δswi3::KanMX ura4-D18 leu1-32 ade6-M210 his3-D1              | 1A; S1A         | lab stock  |
| 3229      | h- Δswi3::KanMX ura4-D18 leu1-32 ade6-M210                      | 1A; S1A         | lab stock  |
| 3500      | h90 mat2-102 pat1-114 ade6-M210                                 | 1B-D; S2A       | lab stock  |
| 3985      | h- Δrec12::ura4+ ura4-D18 leu1-32 ade6-M210                     | 1A; S1A         | lab stock  |
| 3986      | h- Δrec12::ura4+ ura4-D18 ade6-M210                             | 1A; S1A         | lab stock  |
| 4588      | h+ Δswi1::kanMX                                                 | S1A             | lab stock  |
| 5207      | h- lys4-95 ade6-52                                              | Table 1         | lab stock  |
| 5608      | h- hht1-mRFP:KanMX6 leu1-32 ura4-D18                            | 3A-D            | lab stock  |
| 5609      | h+ hht1-mRFP:KanMX6 leu1-32 ura4-D18                            | 3A-D            | lab stock  |
| 5786      | h- hht1-mRFP:kanMX his7+::lacI-GFP lys1+::lacO leu1-32 ura4-D18 | 4A-D; 5A-D      | lab stock  |
| 5787      | h+ hht1-mRFP:kanMX his7+::lacI-GFP lys1+::lacO leu1-32 ura4-D18 | 4A-D; 5A-D      | lab stock  |
| 6699      | h- pat1-114 Δswi3::KanMX6 ade6-M210                             | 1B-D; S2A       | this study |
| 6858      | h90 mat2-102 pat1-114 Δswi3::KanMX6 ade6-M216                   | 1B-D; S2A       | this study |
| 6859      | h- pat1-114 Dswi1::KanMX6 ade6-M216                             | 1B-D; S2A       | this study |
| 6983      | h- Δswi1::KanMX6 ade6-M26 his4-239                              | Table 1         | this study |
| 7041      | h+ Δswi1::KanMX6 ade6-52 lys4-95                                | Table 1         | this study |
| 7042      | h- Δswi3::KanMX6                                                | S1A             | this study |
| 7229      | h+ Δswi3::KanMX6 ade6-M26 his4-239                              | Table 1         | this study |

|      |                                                                                                   |                   |            |
|------|---------------------------------------------------------------------------------------------------|-------------------|------------|
| 7234 | h90 mat2-102 pat1-114 Δswi1::KanMX6 ade6-M210                                                     | 1B-D; S2A         | this study |
| 7299 | h- Δswi3::KanMX6 ade6-52 lys4-95                                                                  | Table 1           | this study |
| 7300 | h+ Δswi1::KanMX6 ura4-D18 leu1-32 ade6-m210 hht1-mRFP:KanMX6 his7+lacI-GFP lys1+:lacO             | 4A-D; 5A-D        | this study |
| 7301 | h- Δswi1::KanMX6 ura4-D18 leu1-32 ade6-m210 hht1-mRFP:KanMX6                                      | 4A-D; 5A-D        | this study |
| 7302 | h- Δswi3::KanMX6 ura4-D18 leu1-32 ade6-m210 his3-D1 hht1-mRFP:KanMX6                              | 3A-D; 4A-D; S3A-C | this study |
| 7303 | h+ Δswi3::KanMX6 ura4-D18 leu1-32 ade6-m210 hht1-mRFP:KanMX6 lys1+:lacO                           | 4A-D; 5A-D        | this study |
| 7310 | h- Δswi3::KanMX6 ura4-D18 leu1-32 ade6-m210 hht1-mRFP:KanMX6 his7+lacI-GFP lys1+:lacO             | 4A-D; 5A-D        | this study |
| 7320 | h+ Δswi1::KanMX6 ura4-D18 leu1-32 ade6-m210 his3-D1 hht1-mRFP:KanMX6                              | 3A-D; 4A-D; S3A-C | this study |
| 7415 | h- Δswi1::KanMX6 ura4-D18 leu1-32 ade6-m210 rec8-GFP:Kan(YW) hht1-mRFP:KanMX6                     | 8A-E; S4A-G       | this study |
| 7416 | h- Δswi3::KanMX6 ura4-D18 leu1-32 ade6-m210 his3-D1 rec8-GFP:Kan(YW) hht1-mRFP:KanMX6             | 8A-E; S4A-G       | this study |
| 7444 | h+ Δswi1::KanMX6 ura4-D18 leu1-32 ade6-m210 rec8-GFP:Kan(YW) hht1-mRFP:KanMX6                     | 8A-E; S4A-G       | this study |
| 7445 | h+ Δswi3::KanMX6 ura4-D18 leu1-32 ade6-m210 rec8-GFP:Kan(YW) hht1-mRFP:KanMX6                     | 8A-E; S4A-G       | this study |
| 7450 | h- Δswi1::KanMX6 Δrec12::ura4+ ura4-D18 leu1-32 ade6-m210                                         | 1A; S1A           | this study |
| 7451 | h+ Δswi1::KanMX6 Δrec12::ura4+ ura4-D18 leu1-32 ade6-m210 his3-D1                                 | 1A; S1A           | this study |
| 7454 | h- Δswi3::KanMX6 Δrec12::ura4+ ura4-D18 leu1-32 ade6-m210 his3-D1                                 | 1A; S1A           | this study |
| 7455 | h+ Δswi3::KanMX6 Δrec12::ura4+ ura4-D18 leu1-32 ade6-m210 his3-D1                                 | 1A; S1A           | this study |
| 7469 | h+ hht1-mRFP:KanMX6 rad11-Cerulean::hphMX rad22-YFP-natMX leu1-32 ade6-M210 ura4-D18 (rad11=ssb1) | 2A-D              | lab stock  |
| 7470 | h- hht1-mRFP:KanMX6 rad11-Cerulean::hphMX rad22-YFP-natMX leu1-32 ade6-M210 ura4-D18 (rad11=ssb1) | 2A-D              | lab stock  |
| 7538 | h90 mat2-102 pat1-114 Δswi3::KanMX6 Δrec12::ura4+ ura4-D18 ade6-m210                              | S1B-D; S2B        | this study |
| 7540 | h- pat1-114 Δswi3::KanMX6 Δrec12::ura4+ ura4-D18 ade6-m216                                        | S1B-D; S2B        | this study |
| 7544 | h90 mat2-102 pat1-114 Δswi1::KanMX6 Δrec12::ura4+ ura4-D18 ade6-m210                              | S1B-D; S2B        | this study |
| 7547 | h- pat1-114 Δswi1::KanMX6 Δrec12::ura4+ ura4-D18 ade6-m216                                        | S1B-D; S2B        | this study |
| 7561 | h+ Δswi1::KanMX Δswi3::KanMX6 ura4-D18 leu1-32 ade6-M210 his3-D1                                  | 1A                | this study |
| 7562 | h- Δswi1::KanMX Δswi3::KanMX6 ura4-D18 leu1-32 ade6-M210 his3-D1                                  | 1A                | this study |
| 7564 | h- pat1-114 Δswi3::KanMX6 ura4-D18 ade6-M210 rec8-GFP:Kan(YW)                                     | S4E               | this study |
| 7572 | h90 mat2-102 pat1-114 Δswi3::KanMX6 ade6-216 rec8-GFP:Kan(YW) hht1-mRFP:KanMX6                    | S4E               | this study |
| 7574 | h90 mat2-102 pat1-114 Δswi1::KanMX6 ade6-210 rec8-GFP:Kan(YW)                                     | S4E               | this study |
| 7576 | h- pat1-114 Δswi1::KanMX6 ade6-216 rec8-GFP:Kan(YW)                                               | S4E               | this study |
| 7593 | h- Δswi1::KanMX6 ura4-D18 leu1-32 ade6-m210 hht1-mRFP:KanMX6 rad11-Cerulean:hphMX rad22-YFP:natMX | 2A-D              | this study |
| 7594 | h+ Δswi1::KanMX6 ura4-D18 leu1-32 ade6-m210 hht1-mRFP:KanMX6 rad11-Cerulean:hphMX rad22-YFP:natMX | 2A-D              | this study |
| 7598 | h- Δswi3::KanMX6 ura4-D18 leu1-32 ade6-m210 hht1-mRFP:KanMX6 rad11-Cerulean:hphMX rad22-YFP:natMX | 2A-D              | this study |
| 7602 | h+ Δswi3::KanMX6 ura4-D18 leu1-32 ade6-m210 hht1-mRFP:KanMX6 rad11-Cerulean:hphMX rad22-YFP:natMX | 2A-D              | this study |

|      |                                                                                               |             |            |
|------|-----------------------------------------------------------------------------------------------|-------------|------------|
| 7663 | h+ leu2-120                                                                                   | Table 1     | this study |
| 7664 | h- ura2-10                                                                                    | Table 1     | this study |
| 7666 | h+ his7-36                                                                                    | Table 1     | this study |
| 7670 | h- Δswi1::KanMX6 leu2-120                                                                     | Table 1     | this study |
| 7672 | h+ Δswi1::KanMX6 ura2-10                                                                      | Table 1     | this study |
| 7674 | h+ Δswi1::KanMX6 leu1-32                                                                      | Table 1     | this study |
| 7675 | h- Δswi1::KanMX6 his7-36                                                                      | Table 1     | this study |
| 7677 | h+ Δswi3::KanMX6 leu2-120                                                                     | Table 1     | this study |
| 7678 | h- Δswi3::KanMX6 ura2-10                                                                      | Table 1     | this study |
| 7679 | h- Δswi3::KanMX6 leu1-32                                                                      | Table 1     | this study |
| 7681 | h+ Δswi3::KanMX6 his7-36                                                                      | Table 1     | this study |
| 7748 | h- rec8-GFP:KanMX6 hht1-mRFP:KanMX6 pat1-114 ura4-D18 ade6-m216                               | 8A-E; S4E-G | this study |
| 7777 | h+ rec27-205-GFP-KanMX hht1-mRFP:KanMX6 pat1-114 ura4-D18 ade6-3049 lys4-95                   | 6A-E; S4A-B | this study |
| 7779 | h- rec27-205-GFP-KanMX hht1-mRFP:KanMX6 pat1-114 ura4-D18 ade6-3049 lys4-95                   | 6A-E; S4A-B | this study |
| 7780 | h+ Δswi1::KanMX6 rec27-205-GFP-KanMX hht1-mRFP:KanMX6 pat1-114 leu1-32 ade6- his- lys4-95     | 6A-E; S4A-B | this study |
| 7781 | h- Δswi1::KanMX6 rec27-205-GFP-KanMX hht1-mRFP:KanMX6 pat1-114 ade6-                          | 6A-E; S4A-B | this study |
| 7783 | h- Δswi3::KanMX6 rec27-205-GFP-KanMX hht1-mRFP:KanMX6 pat1-114 ade6-                          | 6A-E; S4A-B | this study |
| 7784 | h+ Δswi3::KanMX6 rec27-205-GFP-KanMX hht1-mRFP:KanMX6 pat1-114 leu1-32 ade6-                  | 6A-E; S4A-B | this study |
| 7840 | h+ rec8-GFP:KanMX6 hht1-mRFP:KanMX6 pat1-114 ura4-D18 ade6-m210                               | 8A-E; S4E-G | this study |
| 7863 | h+ sgo1-FLAG:GFP hht1-mRFP:KanMX6 ura4-D18 leu- ade6-M210 his3-D1                             | 7A-E; S4C-D | this study |
| 7864 | h- sgo1-FLAG:GFP hht1-mRFP:KanMX6 ura4-D18 leu- ade6-M210                                     | 7A-E; S4C-D | this study |
| 7902 | h90 mat2-102 pat1-114 Δrec12::ura4+ ura4-D18 ade6-M210                                        | S1B-D; S2B  | this study |
| 7907 | h- pat1-114 Δrec12::ura4+ ura4-D18 leu1-32 ade6-M216                                          | S1B-D; S2B  | this study |
| 8121 | h- Δswi1::KanMX6 ura4-D18 leu1-32 hht1-mRFP:KanMX6 his7+lacI-GFP lys1+:lacO                   | 4A-D; 5A-D  | this study |
| 8122 | h+ Δswi3::KanMX6 ura4-D18 leu1-32 ade6-m210 his3-D1 hht1-mRFP:KanMX6 his7+lacI-GFP lys1+:lacO | 4A-D; 5A-D  | this study |
| 8123 | h- cnp1-mCherry:KanMX6 swi6-GFP:KanMX6 ura4-D18 leu1-32 ade6-M210                             | 9A-D        | this study |
| 8125 | h- Δswi1::KanMX6 cnp1-mCherry:KanMX6 swi6-GFP:KanMX6 ura4-D18 leu1-32 ade6-M210               | 9A-D        | this study |
| 8126 | h+ Δswi1::KanMX6 cnp1-mCherry:KanMX6 swi6-GFP:KanMX6 ura4-D18 leu1-32 ade6-M210               | 9A-D        | this study |
| 8127 | h+ Δswi3::KanMX6 cnp1-mCherry:KanMX6 swi6-GFP:KanMX6 ura4-D18 leu1-32 ade6-M210               | 9A-D        | this study |
| 8128 | h- Δswi3::KanMX6 cnp1-mCherry:KanMX6 swi6-GFP:KanMX6 ura4-D18 leu1-32 ade6-M210               | 9A-D        | this study |
| 8129 | h90 mat2-102 pat1-114 rec8-GFP:KanMX6 hht1-mRFP:KanMX6 leu1-32 ade6-M210                      | S4E         | this study |

|      |                                                                                              |  |  |  |  |             |            |
|------|----------------------------------------------------------------------------------------------|--|--|--|--|-------------|------------|
| 8172 | h+ cnp1-mCherry:KanMX6 swi6-GFP:KanMX6 ura4-D18 leu1-32 ade6-M210                            |  |  |  |  | 9A-D        | this study |
| 8180 | h+ $\Delta$ swi1::KanMX6 sgo1-GFP:KanMX6 hht1-mRFP:KanMX6 ura4-D18 leu1-32 ade6-M210 his3-D1 |  |  |  |  | 7A-E; S4C-D | this study |
| 8181 | h+ $\Delta$ swi3::KanMX6 sgo1-GFP:KanMX6 hht1-mRFP:KanMX6 ura4-D18 leu1-32 ade6-M210 his3-D1 |  |  |  |  | 7A-E; S4C-D | this study |
| 8182 | h- $\Delta$ swi3::KanMX6 sgo1-GFP:KanMX6 hht1-mRFP:KanMX6 ura4-D18 leu1-32 ade6-M210 his3-D1 |  |  |  |  | 7A-E; S4C-D | this study |
| 8195 | h- $\Delta$ swi1::KanMX6 sgo1-GFP:KanMX6 hht1-mRFP:KanMX6 ura4-D18 leu1-32 ade6-M210         |  |  |  |  | 7A-E; S4C-D | this study |

## SUPPLEMENTAL FIGURE LEGENDS

**Supplemental Figure 1. Characterization of fork destabilization in the absence of Rec12.** (A) Plating efficiency was carried out to determine if lack of the FPC components affects cell viability similarly to spore viability. Logarithmic mitotic cells were counted and plated on YES agar. Resulting colony number per plate was divided by the initial microscope cell count. Percent figures indicate viability for each genotype and are presented relative to those of the wild type strain.  $n \geq 4000$  cells per genotype. Significance was calculated using chi-squared analysis. Error bars represent 95% confidence intervals.  $p$ -values are reported as follows: \*\*\* $p < 0.001$ . Synchronous meiosis in *mat2-102/h-pat1-114/pat1-114* diploids was performed for 8 hours. For (B-D), hour 0 denotes the time when cells were switched from 25°C to 34°C to elicit meiotic induction. Cells were harvested every hour and examined as indicated in each panel. (B) FACS profiles showing progression of replication through meiotic induction. DNA doubling is denoted as the change from 2C to 4C DNA content. Images are representative of three independent trials. (B) Pulsed field gel electrophoresis used to separate whole chromosomes by size and to assess formation and repair of meiotic DSBs. Smears migrating faster than chromosome III represent DSBs. Images of ethidium bromide-stained agarose gels represent three different trials. (C) DAPI-stained nuclei were counted for each time point to ascertain progression through meiotic divisions, which are reported as follows: black stands for 1 nucleus, dark-gray for 2 nuclei, and light-gray for 3 or more nuclei (3+). 2 and 3+ nuclei indicate onset of MI and MII, respectively. Significance was calculated using chi-squared analysis.

**Supplemental Figure 2. Quantification of PGFE.** (A) Graph showing the signal ratio values of DSB formation and repair in wild type cells and the FPC mutants. (B) Graph showing the signal ratio values of DSB formation and repair in cells lacking Rec12 as well as Rec12 and the FPC mutants. Time points correspond to those shown in **Figure 1B-D** and **Supplemental Figure 1B-D**. Hour 0 denotes the time when cells were switched from 25°C to 34°C to elicit meiotic induction. To determine significance, a one-way ANOVA test followed by Tukey family-wise comparison was used.  $p$ -values were greater than 0.05 in both panels. For visual clarity, error bars represent SEM. Figure panels summarize the average of 3 independent experiments.

**Supplemental Figure 3. Lagging chromosomes during MI & MII upon fork destabilization.** (A) Live-cell images of meiotic cells carrying fluorescently tagged Hht1. Panels are divided into individual fluorescent channels. Bright field panels are omitted due to space limitations. A false-color image was generated to show merged channels. Dotted cell outlines are overlaid on panels for easier visualization of meiotic cells. Minute 0 (0') denotes the last nuclear mass contraction in metaphase I before homologous chromosomes separate in anaphase I (10'). Images that show the characteristics of each reported mutant phenotype were used. Displayed time frames were chosen for optimal representation of nuclear dynamics. (B) & (C) Quantification of lagging chromosomes in MI & MII from microscopy images shown in (A). More than 150 cells were scored from at least two independent movies for each genotype. Chi-squared analysis was used to determine significance.  $p$ -values are reported as follows:  $p < 0.001$  \*\*\*. Error bars represent 95% confidence intervals.

**Supplemental Figure 4. Timing of Rec27-GFP, Sgo1-GFP, and Rec8-GFP in relation to the meiotic divisions.** (A & D) Schematic diagrams showing the timing of linear elements elimination and shugoshin duration at the centromere during metaphase. (G) Schematic diagram showing the duration of Rec8-GFP foci between MI & MII. (B, C, & F) Time quantification of asci without the specified signal before MI. (E) Box plot of Rec8-GFP localization at the centromere at three distinct stages: late metaphase, early MI, and early MII. Each box contains values for 3 independent chromatin immunoprecipitation experiments (with at least two technical replicates per trial) followed by Q-PCR. Tukey whiskers are used to show data points that are less than 1.5 x inter-quartile range (IQR) from the first and third quartiles. Fold values were calculated using the  $2^{-\Delta\Delta Ct}$  (Livak) Method (Livak and Schmittgen, 2001). To determine fold change in cohesion, the input and the immuno-precipitated (IP) fractions were used as the calibrator and test parameters, respectively, while *act1* was used as the reference gene (testing for Rec8-GFP localization at the euchromatin) and the centromeric *dg* locus as the target locus (testing for Rec8-GFP localization at the heterochromatin-rich centromere). Significance was determined using a Wilcoxon signed-ranked test. Panels A, D, and G show diagrams of the timing information presented in **Figure 6E**, **Figure 7E**, and **Figure 8E** in the context of metaphase I and the two meiotic divisions. Black arrows with white stripes indicate time progression toward MI, except for Rec8-GFP, which is shown between MI and MII. The distance between each white stripe

denotes 10 minutes. A 10-minute bar is provided for visual reference at the bottom of each diagram. Dotted lines extending toward MI show the time between signal termination and start of meiotic segregation. For all movies, more than 150 cells were scored from at least two independent movies for each genotype. A one-way ANOVA test followed by Tukey family-wise comparison was used to calculate significance.  $p$ -values are reported as follows:  $p < 0.01$  \*\*,  $p < 0.001$  \*\*\*. Error bars represent 95% confidence interval.

**Supplemental Figure 5. Statistical summary of experiments in this study.** Heat map showing  $p$ -values for each experimental question addressed in this work. Column labels show pair-wise comparisons between the WT and the FPC mutants and between each FPC component. Row labels indicate each studied experimental question. The  $p$ -value index provides a color gradient representing  $p$ -value ranges obtained in each experiment. The darker the color, the more significant the result and vice versa.



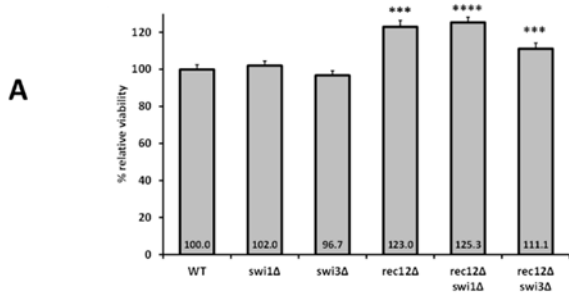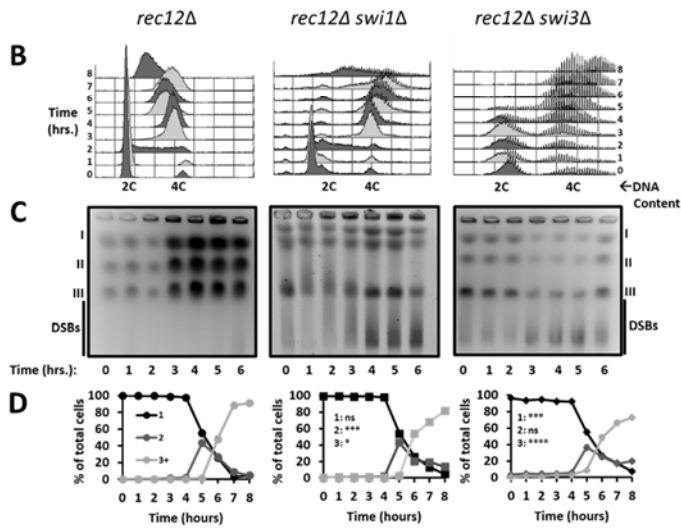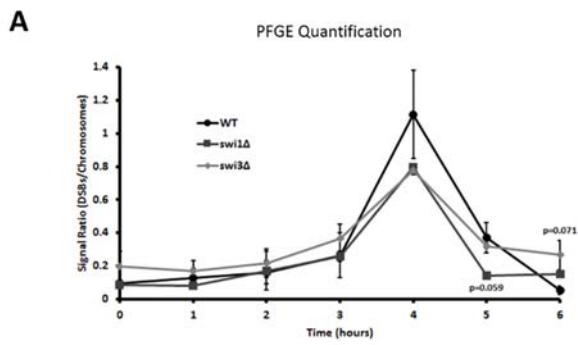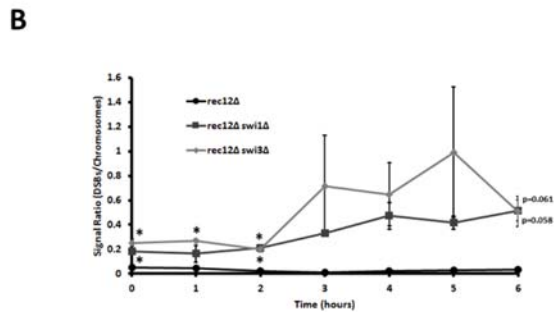

**A**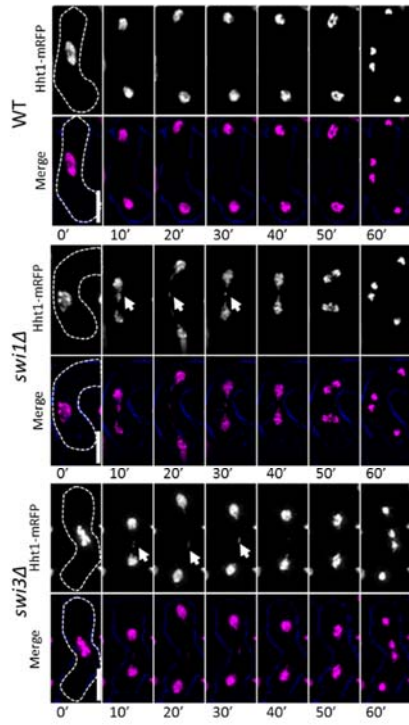**B**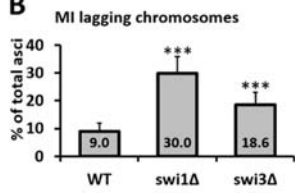**C**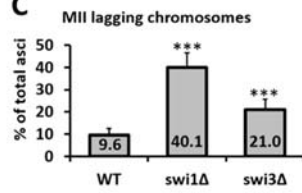

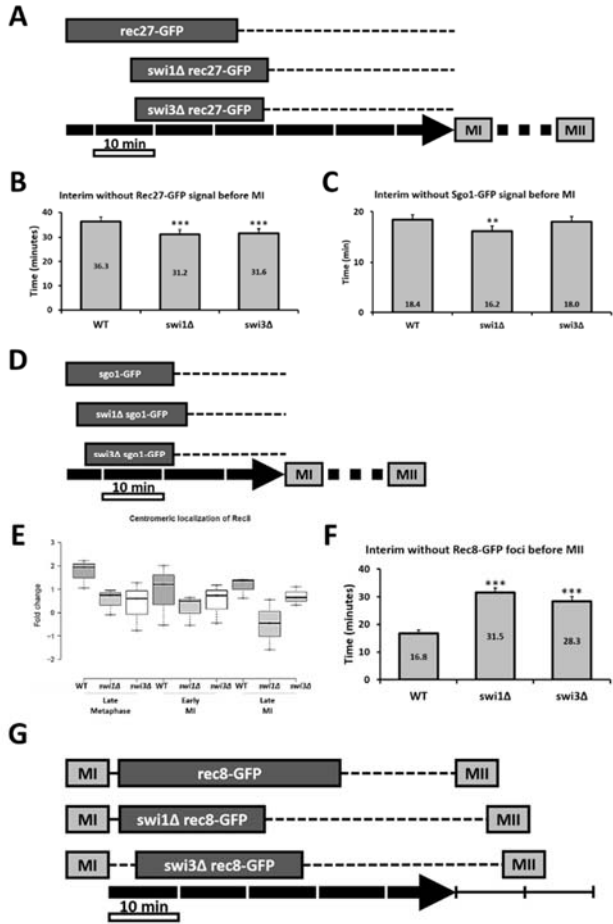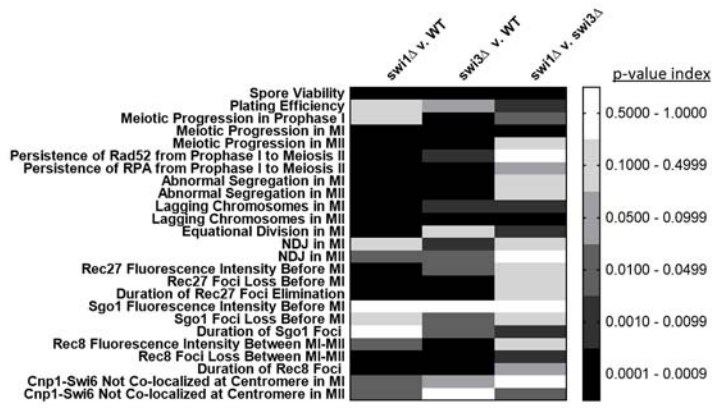

Supplement: supp_E17-02-0101v1_CombinedSupMats.pdf [file supp_E17-02-0101v1_CombinedSupMats.pdf]
